# Supplementary material
Source: publisher site journal article supplement (https://www.spandidos-publications.com/8084/downloadSupplementary)
Supplement: Supplementary file 1 [file downloadSupplementary]

## Sheet: 附表12
Table SVI. Gene identifiers alongside their respective coefficient values derived from the regression analysis.
KLK6	0.111997
EFNB2	0.358846
ADAMTS12	0.238243
CD109	0.260431
